# Supplementary material
Source: ML conference proceedings conference paper supplement (https://openreview.net/forum?id=XxRKqFsvoK)

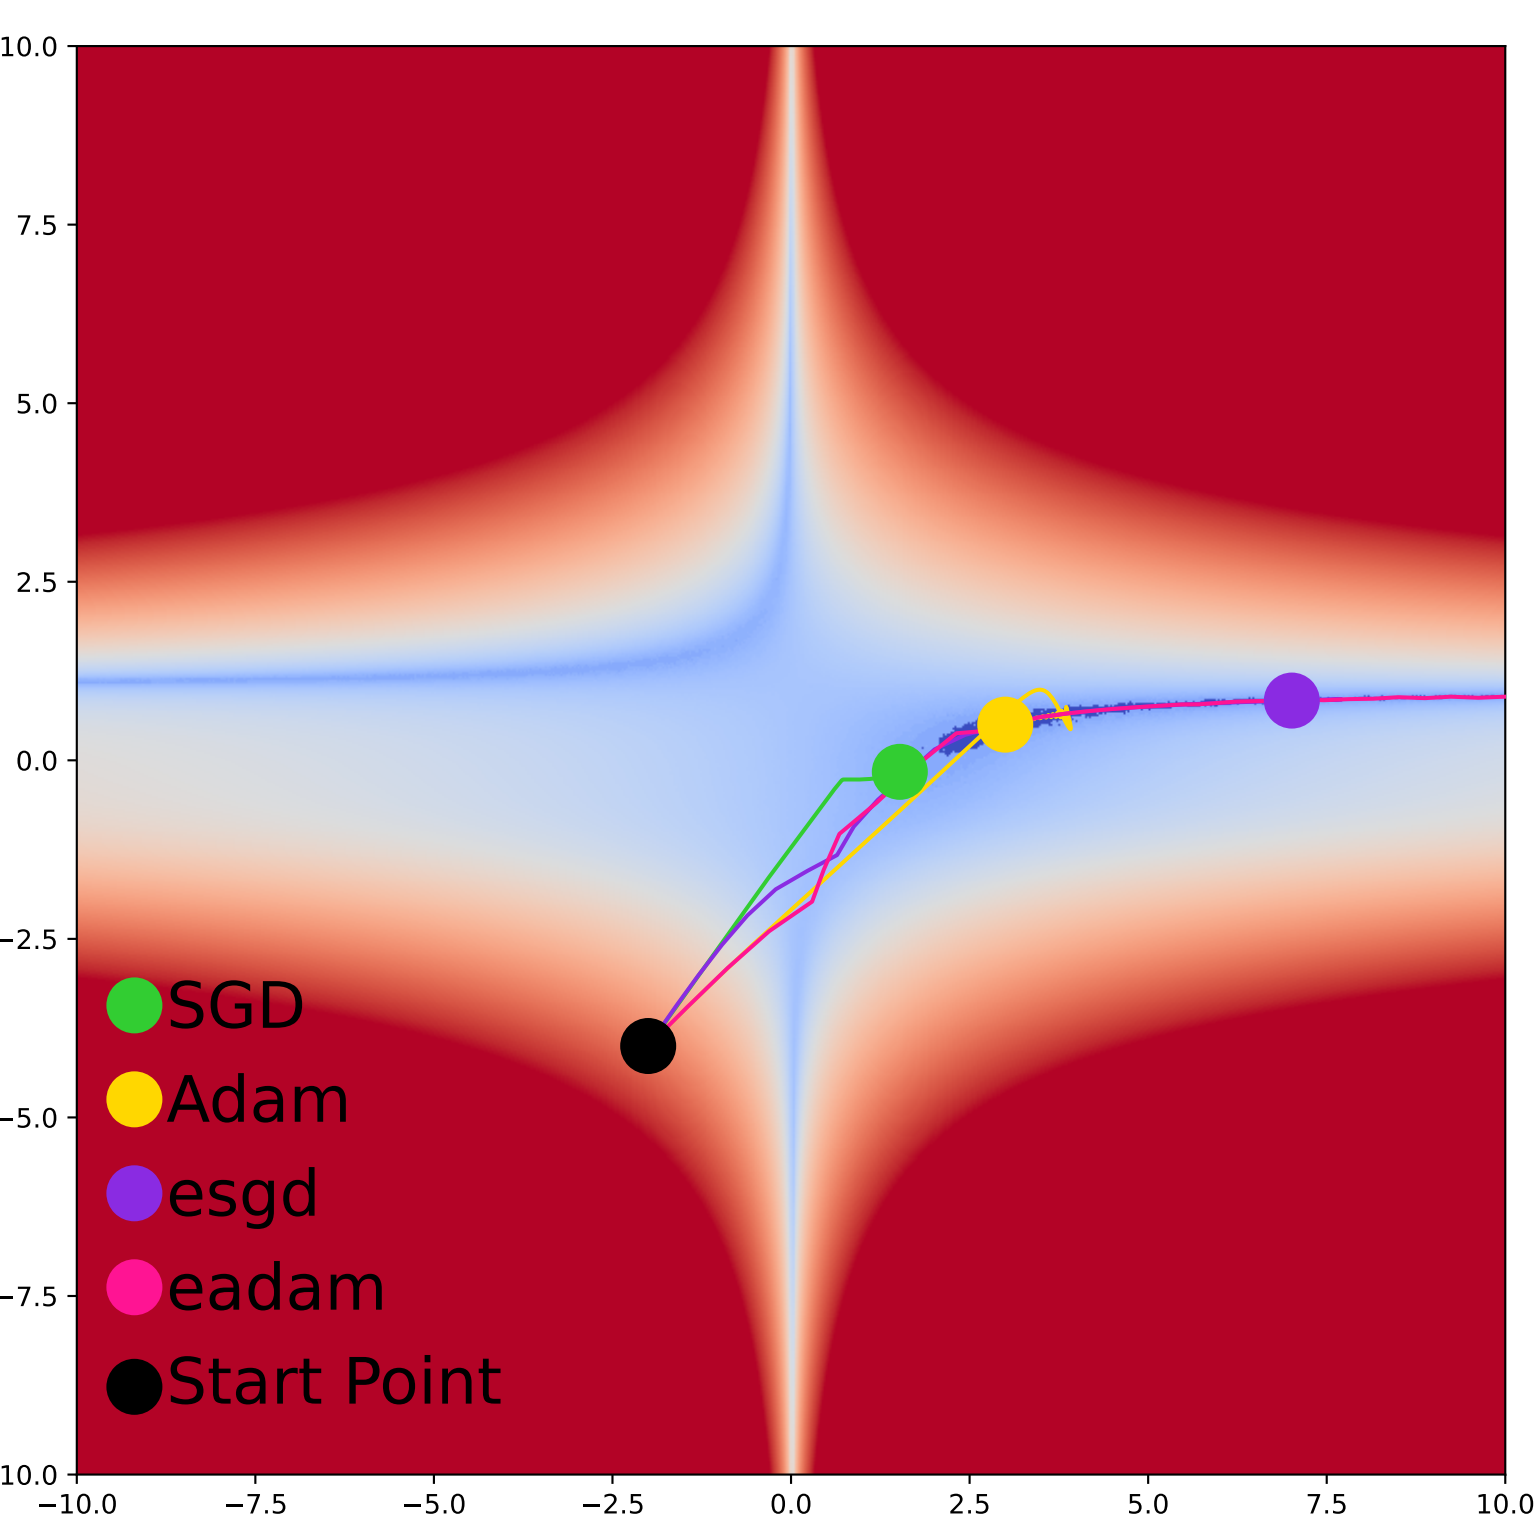

Supplement: supplementary_material [file 366765_heatmap_-10_10_400_-10_10_400_0_100000_1.pdf › 28714_Exploring_Landscapes_for_Supplementary Material/source_code/2d_test/image/mountain_game/366765_heatmap_-10_10_400_-10_10_400_0_100000_1.pdf]

PPL Variation over First 1500 Iterations on 345M GPT with GPT-2-Output-Dataset

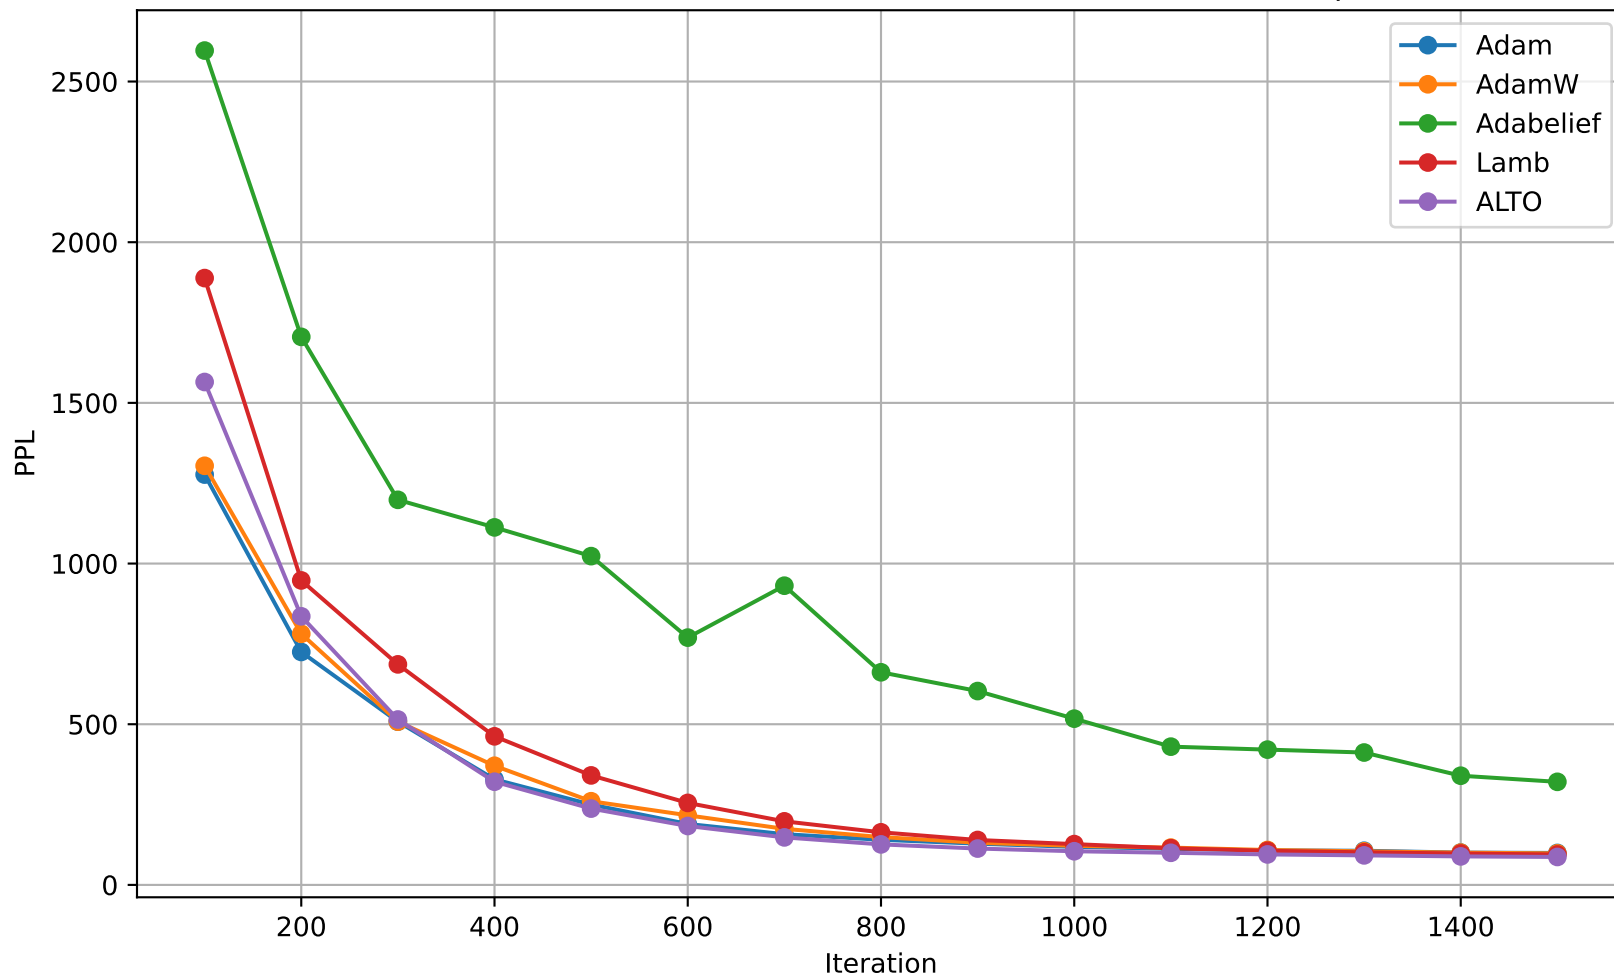

Supplement: supplementary_material [file training_ppl_plot.pdf › 28714_Exploring_Landscapes_for_Supplementary Material/source_code/gpt2/training_ppl_plot.pdf]

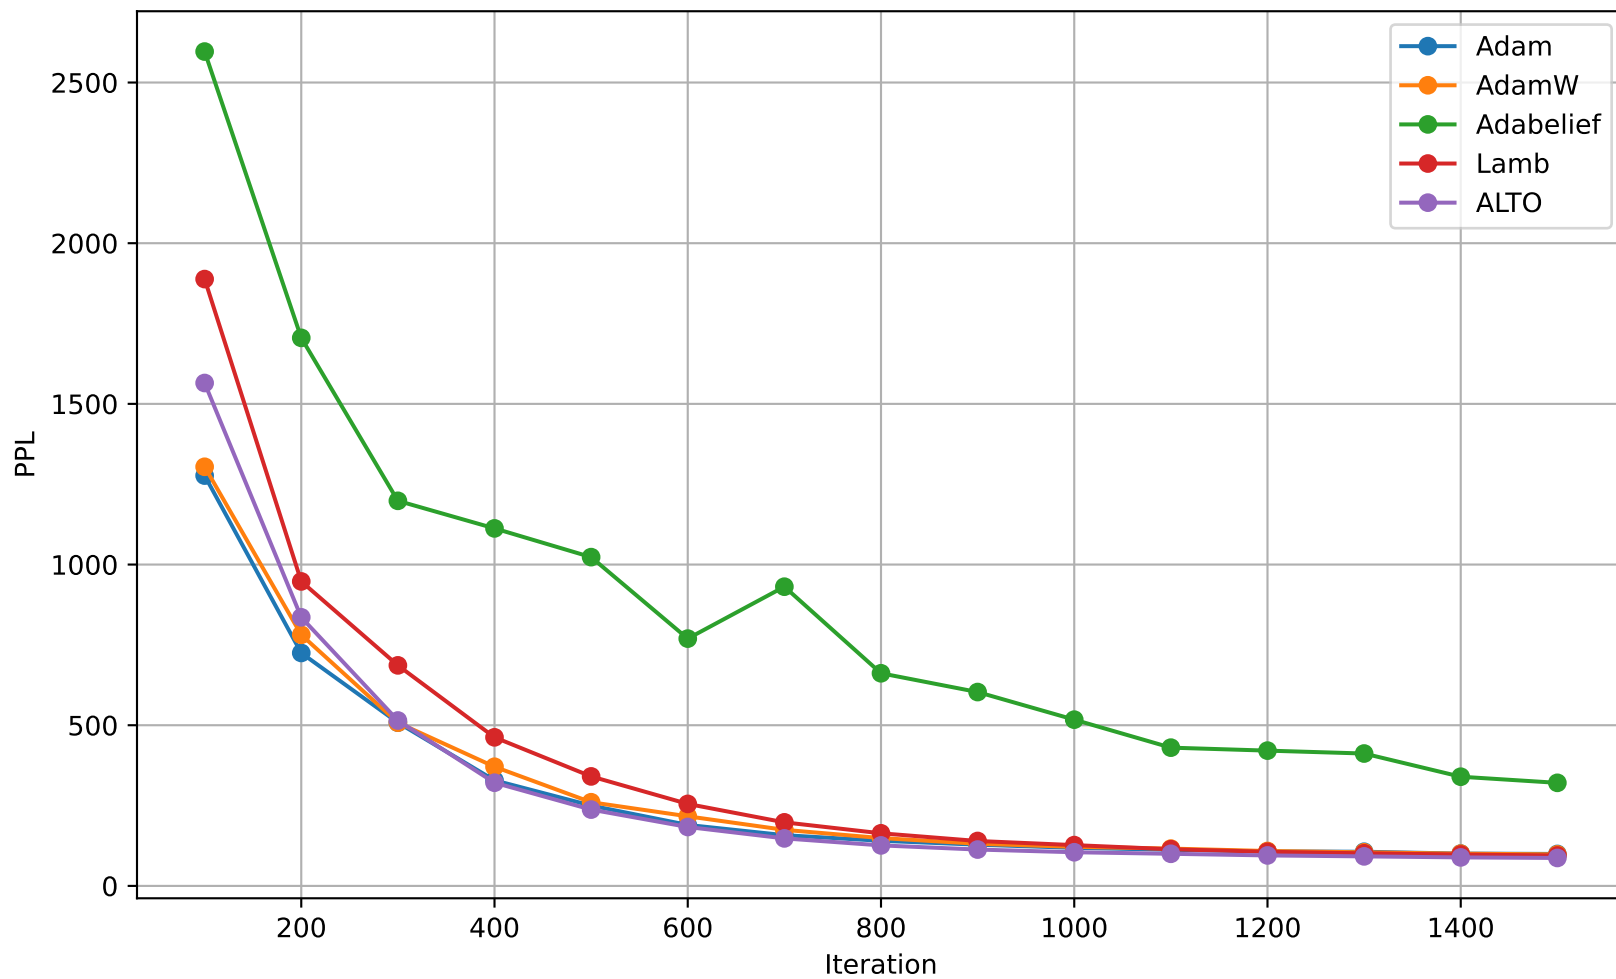

Supplement: supplementary_material [file training_ppl_plot_notitle.pdf › 28714_Exploring_Landscapes_for_Supplementary Material/source_code/gpt2/training_ppl_plot_notitle.pdf]

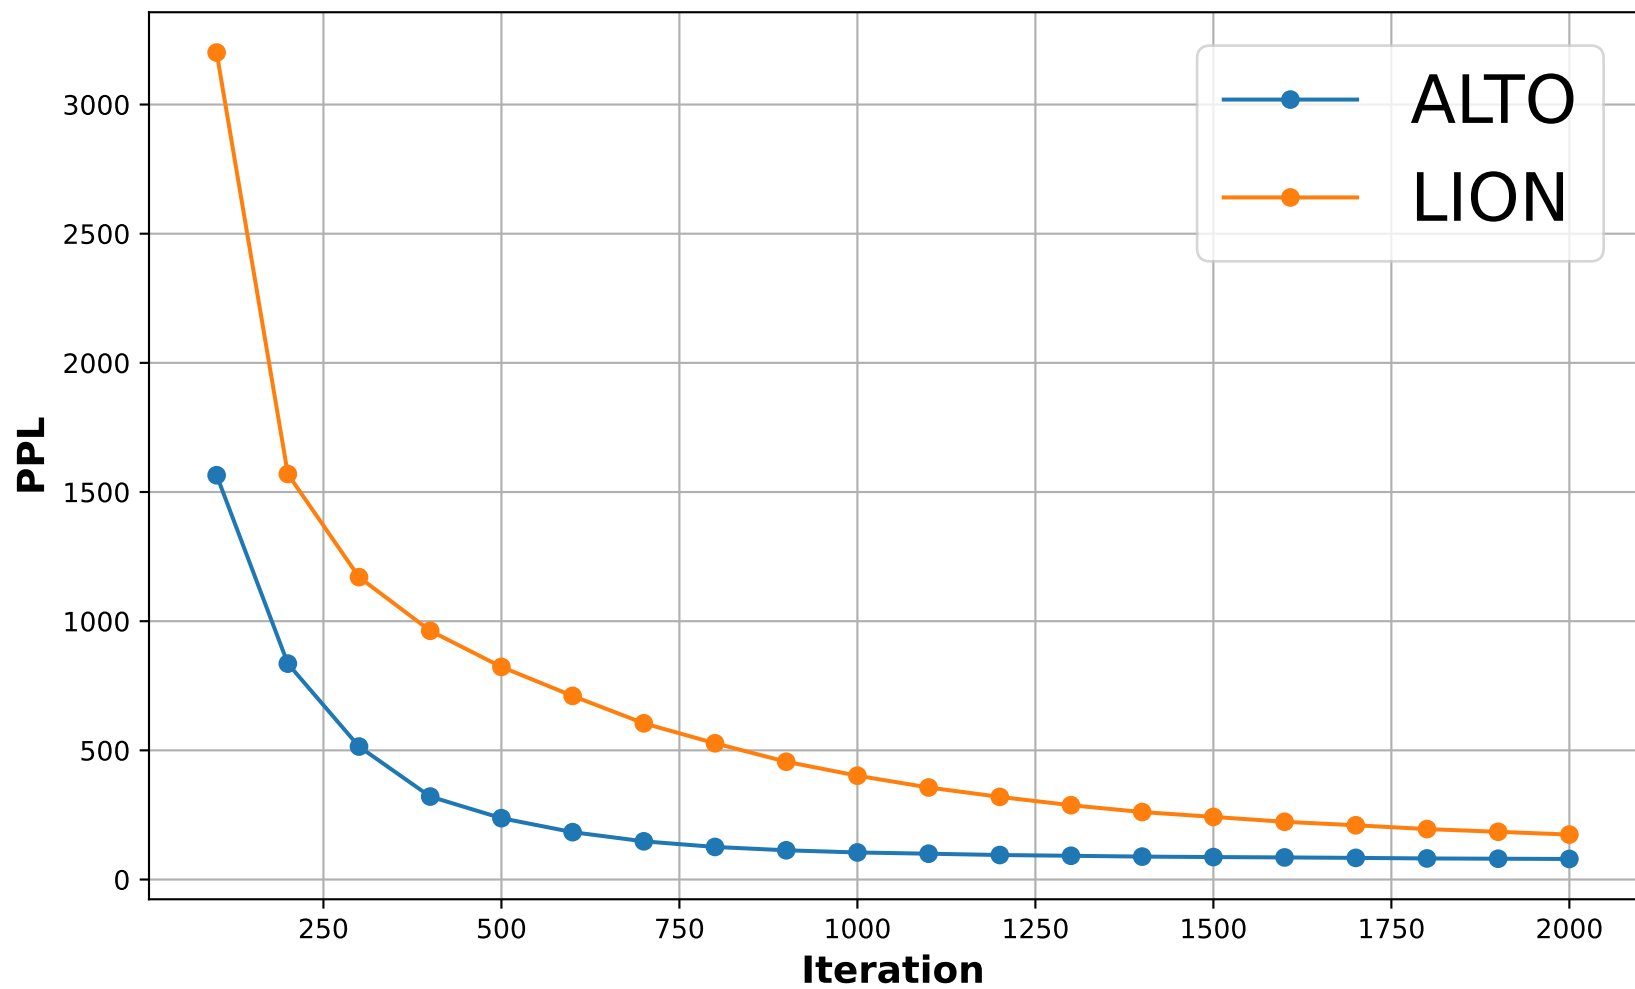

Supplement: supplementary_material [file training_ppl_plot_ours_lion.pdf › 28714_Exploring_Landscapes_for_Supplementary Material/source_code/gpt2/training_ppl_plot_ours_lion.pdf]
